# Supplementary material
Source: publisher site journal article supplement (https://www.degruyterbrill.com/publication/isbn/9783110272826/downloadAsset/9783110272826_Contents.pdf)
Supplement: Supplementary file 1 [file 9783110272826_Contents.pdf]

# Inhalt / Table of Contents

**Vorwort / Preface — V**

Oda Wischmeyer

**Einführung / Introduction — 1**

**Teil 1 / Part 1: Forschungsgeschichte / History of Research**

Johannes Wischmeyer

**Universalismus als Tendenz und Entwicklungsmoment. Die Frage nach Markus und Paulus in der historisch-kritischen Geschichtsschreibung des Urchristentums von 1850 bis 1910 — 19**

**Teil 2 / Part 2: Historische Fragen / Historical Considerations**

Michael P. Theophilos

**The Roman Connection: Paul and Mark — 45**

David C. Sim

**The Family of Jesus and the Disciples of Jesus in Paul and Mark: Taking Sides in the Early Church's Factional Dispute — 73**

**Teil 3 / Part 3: Theologische Heuristik / Theological Considerations**

Nina Irrgang

**„Judentum“ im Markusevangelium und in den Paulusbriefen. Begriffe, Konzepte und Narrationen — 103**

Jesper Svartvik

**“East is East and West is West:” The Concept of Torah in Paul and Mark — 157**

Florian Wilk

**„Die Schriften“ bei Markus und Paulus — 189**

Elizabeth V. Dowling

**“Do this in Remembrance”: Last Supper Traditions in Paul and Mark — 221**

Michael Theobald

**Die Passion Jesu bei Paulus und Markus — 243**

Udo Schnelle

**Paulinische und markinische Christologie im Vergleich — 283**

Andreas Lindemann

**Das Evangelium bei Paulus und im Markusevangelium — 313**

Oda Wischmeyer

**Konzepte von Zeit bei Paulus und im Markusevangelium — 361**

Eve-Marie Becker

**Die Konstruktion von ‚Geschichte‘. Paulus und Markus im Vergleich — 393**

William Loader

**The Concept of Faith in Paul and Mark — 423**

Thomas Söding

**Das Liebesgebot bei Markus und Paulus. Ein literarischer und theologischer Vergleich — 465**

Lorenzo Scornaienchi

**Die Relativierung des Unreinen. Der Einfluss des Paulus auf „Markus“ in Bezug auf die Reinheit — 505**

John Painter

**Mark and the Pauline Mission — 527**

## Teil 4 / Part 4: Rezeptionsgeschichte / Reception-History

Alan H. Cadwallader

**The Struggle for Paul in the Context of Empire: Mark as a Deutero-Pauline Text — 557**

David C. Sim

**The Reception of Paul and Mark in the Gospel of Matthew — 589**

Lukas Bormann

**Die Paulusbriefe und das Markusevangelium in der Perspektive des  
Lukasevangeliums und der Apostelgeschichte — 617**

Wilhelm Pratscher

**Die Rezeption von Paulus und Markus bei Johannes — 647**

Ian J. Elmer

**Robbing Paul to Pay Peter: The Papias Notice on Mark — 671**

**Beiträger und Beiträgerinnen/ List of Contributors — 699**

**Autorenregister/Index of Modern Authors — 701**

**Sachregister — 707**

**Index of Subjects — 709**
